# Supplementary material
Source: Springer Nature journal article supplement (https://www.springermedizin.de/resource/supplementary/12885_2013_4542_MOESM4_ESM.pdf/9466660)

Figure - 4

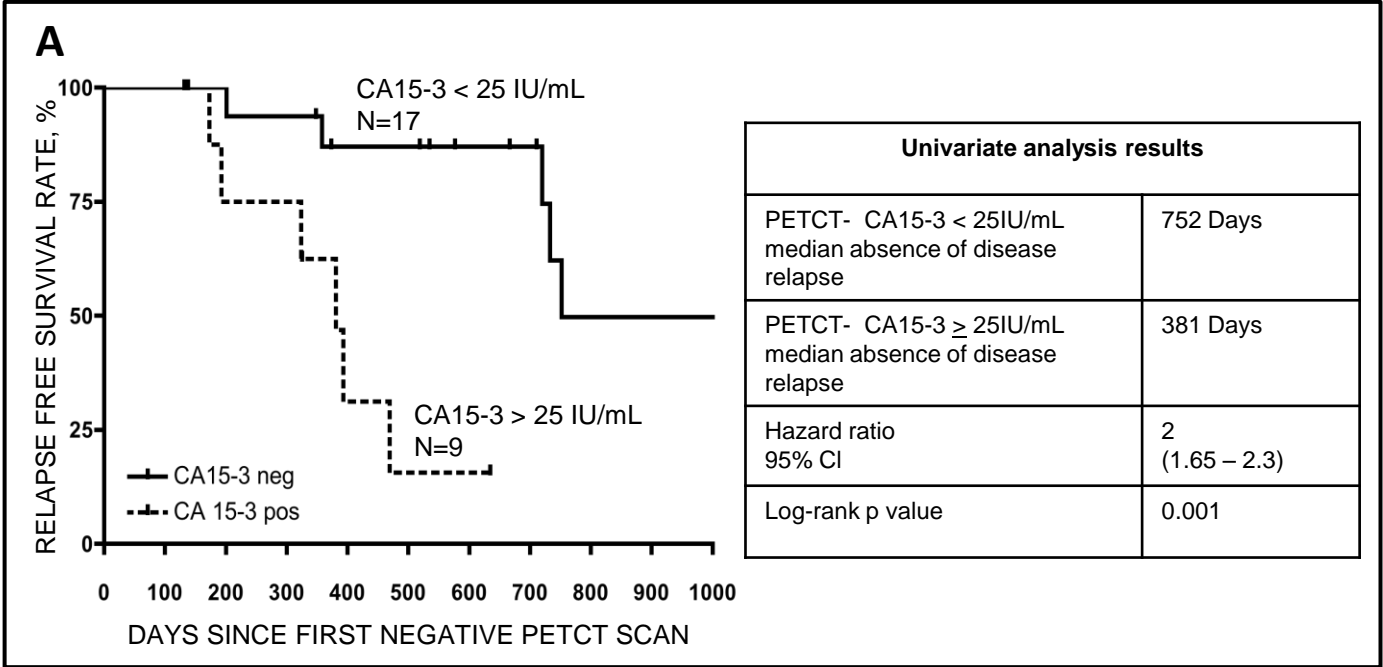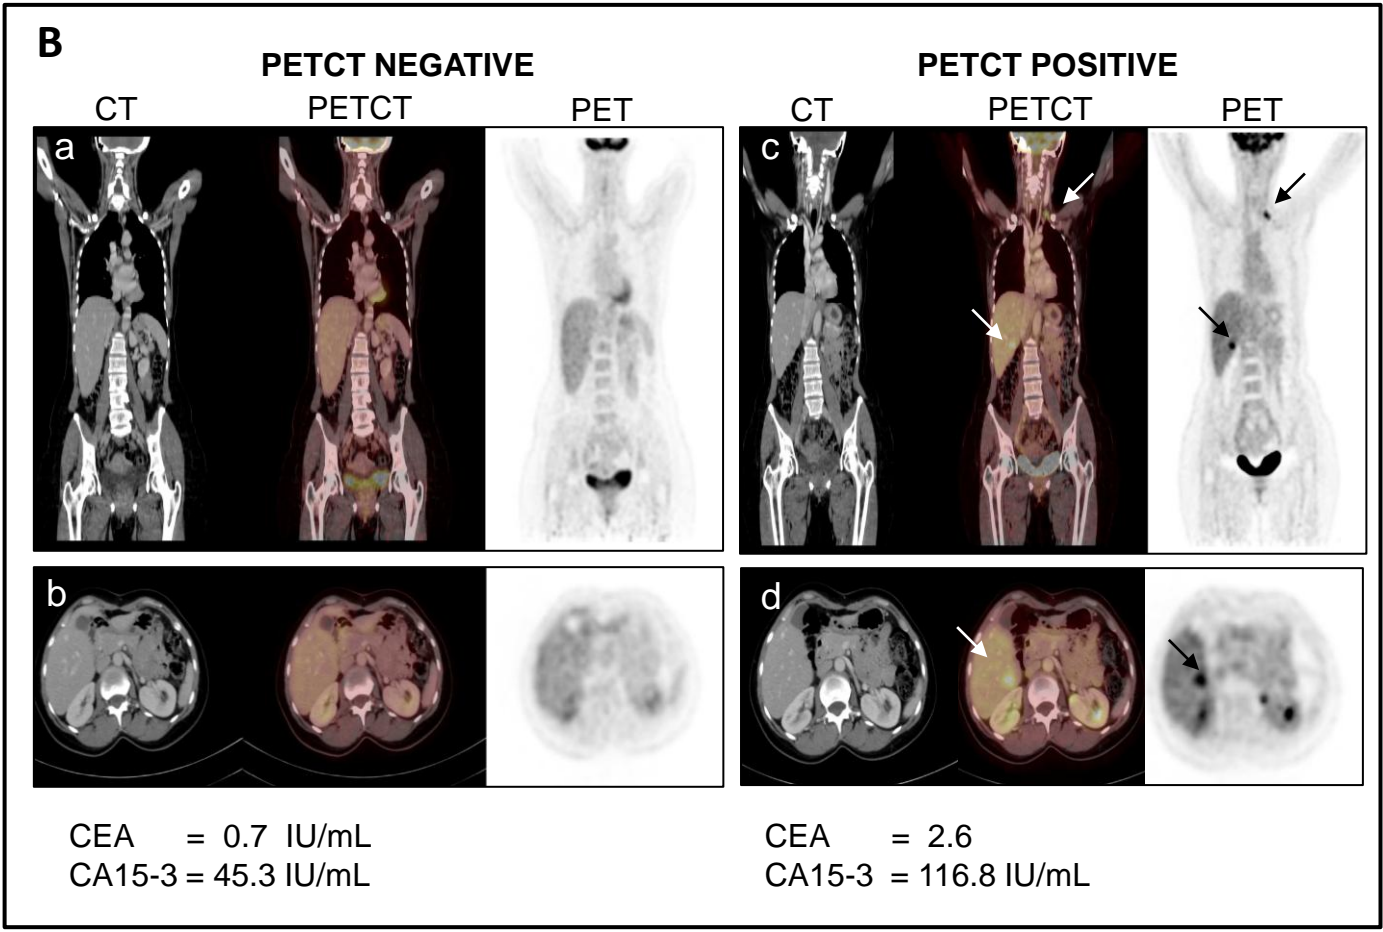

Supplement: MOESM4 [file 9466660]
